# Supplementary material
Source: ML conference proceedings conference paper supplement (https://openreview.net/forum?id=NjImFaBEHl)
Supplement: supplementary_material [file attachment]

---

# Divide and Contrast: Source-free Domain Adaptation via Adaptive Contrastive Learning (Supplementary Material)

---

Ziyi Zhang<sup>1</sup>, Weikai Chen<sup>3</sup>, Hui Cheng<sup>2</sup>, Zhen Li<sup>4,5</sup>, Siyuan Li<sup>6</sup>, Liang Lin<sup>2</sup>, Guanbin Li<sup>2†</sup>

<sup>1</sup>National Key Laboratory of Novel Software Technology, Nanjing University, Nanjing, China

<sup>2</sup>School of Computer Science and Engineering, Sun Yat-sen University, Guangzhou, China

<sup>3</sup>Tencent America, <sup>4</sup>The Chinese University of Hong Kong, Shenzhen, China

<sup>5</sup>Shenzhen Research Institute of Big Data, Shenzhen, China

<sup>6</sup>AI Lab, School of Engineering, Westlake University, Hangzhou, China

zhangziyi@lamda.nju.edu.cn, liguanbin@mail.sysu.edu.cn

## A Theoretical Details

Our *Divide and Contrast* paradigm mainly divides the target data  $\mathcal{D}_T$  into source-like samples  $\mathcal{D}_S$  and target-specific outliers  $\mathcal{D}_O$  via the network predictions from the source classifier. We claim the consistency robustness (Claim A.1) of the source-like samples. We further show in Theorem A.2 an upper bound of task error on target domain, and design our objective function motivated by constraining the upper bound.

We first review the main notations and assumptions in Section 3. Considering a  $C$ -way classification task, our model consists of source classifier and feature extractor  $\bar{h} = g_s \circ \phi$ , which maps input space  $\mathbb{R}^I$  to prediction vector space  $\mathbb{R}^C$ , and  $h(x) = \arg \max_c \bar{h}(x)_{[c]}$ . Slightly different from the theoretical derivation, we use  $h = g_s \circ \phi$  to denote our model in Section 4 to simplify the symbolic notations. Following in [25, 26, 27, 28], we denote  $\mathcal{D}_{T_c}$  as the conditional distribution (probability measure) of  $\mathcal{D}_T$  given the ground truth  $y = c$ , and also assume that the supports of  $\mathcal{D}_{T_i}$  and  $\mathcal{D}_{T_j}$  are disjoint for all  $i \neq j$ . This canonical assumption shows that the target distribution consists of  $C$  class-wise subpopulations, and different class subpopulations have disjoint supports.

In order to study the local structure, we define that the suitable set of input transformations  $\mathcal{B}(x) \subset \mathcal{D}_T$  takes the general form:

$$\mathcal{B}(x) = \{x' : \exists A \in \mathcal{A} \text{ s.t. } \|(x' - A(x))\| < r\},$$

where  $\|\cdot\|$  is  $L_1$  distance function,  $r > 0$  is a small radius, and  $\mathcal{A}$  is a set of data augmentations.  $\mathcal{B}(x)$  generally depicts the local structures around sample  $x$ , which can be understood as the neighborhood set in [2, 5] and the set of augmented data in [37, 49]. To this end, we further introduce the population consistency error on  $\mathcal{D}_T$  to demonstrate the consistency robustness of predictions from the model within  $\mathcal{B}(x)$ :

$$\mathcal{R}_{\mathcal{D}_T}(h) = \mathbb{E}_{x \sim \mathcal{D}_T} [\mathbb{1}(\exists x' \in \mathcal{B}(x) \text{ s.t. } h(x') \neq h(x))].$$

Following [25, 27, 26], we study target domain relies on the *expansion property*, which implies the continuity of data distributions in each class-wise subpopulations. For this, we first define the neighborhood function of a sample  $x \in \mathcal{D}_{T_i}$  as:  $\mathcal{N}(x) := \mathcal{D}_{T_i} \cap \{x' | \mathcal{B}(x) \cap \mathcal{B}(x') \neq \emptyset\}$ , as well as that of a set  $S \subset \mathcal{D}_T$  as:  $\mathcal{N}(S) := \cup_{x \in S} \mathcal{N}(x)$ .

---

\*Corresponding author.

†Corresponding author.

**Definition A.1** ( $(q, \gamma)$ -constant expansion [26]). We say  $Q$  satisfies  $(q, \gamma)$ -constant expansion for some constant  $q, \gamma \in (0, 1)$ , if for any set  $S \subset Q$  with  $\mathbb{P}_Q[S] > q$ , we have  $\mathbb{P}_Q[\mathcal{N}(S) \setminus S] > \min\{\gamma, \mathbb{P}_Q[S]\}$ .

Our *Divide and Contrast* paradigm selects confident samples (from target data) with prediction probability greater than a threshold  $\tau$ , and regard them as source-like samples:

$$\mathcal{D}_S = \{x_i \mid \max_c \bar{h}(x_i) \geq \tau, x_i \in \mathcal{D}_T\},$$

and the rest target data is target-specific samples  $\mathcal{D}_O = \mathcal{D}_T \setminus \mathcal{D}_S$ . Define the conditional distribution of source-like samples as  $\mathcal{D}_{S_i} = \mathcal{D}_S \cap \mathcal{D}_{T_i}$ . The definition is similar for  $\mathcal{D}_{O_i}$ . The following claim guarantees the consistency and robustness of source-like samples:

**Claim A.1.** Suppose  $h$  is  $L_h$ -Lipschitz w.r.t the  $L_1$  distance, there exists threshold  $\tau \in (0, 1)$  such that the source-like set  $\mathcal{D}_S$  is consistency robust, i.e.  $\mathcal{R}_{\mathcal{D}_S}(h) = 0$ . More specifically,

$$\tau \geq \frac{L_h r}{4} + \frac{1}{2}.$$

*Proof of Claim A.1.* Suppose  $\mathcal{D}_S$  is defined by  $\tau \geq \frac{L_h r}{4} + \frac{1}{2}$ . If  $\exists x, x' \in \mathcal{D}_S$ ,  $x' \in \mathcal{B}(x) \cap \mathcal{D}_S$  s.t.  $\bar{h}(x) \neq \bar{h}(x')$ . Denote  $h(x) = i$ ,  $h(x') = j$ , since  $i \neq j$ , there is  $|\bar{h}(x)_{[i]} - \bar{h}(x')_{[j]}| \geq 2\tau - 1$ , and  $|\bar{h}(x')_{[j]} - \bar{h}(x)_{[i]}| \geq 2\tau - 1$ . Then we have:

$$L_h \|x - x'\| \geq \|\bar{h}(x) - \bar{h}(x')\| \geq |\bar{h}(x)_{[i]} - \bar{h}(x')_{[j]}| + |\bar{h}(x)_{[j]} - \bar{h}(x')_{[i]}| \geq 4\tau - 2 \geq L_h r,$$

Since  $x' \in \mathcal{B}(x)$ ,  $\|x - x'\| < r$ , and Lipschitz constant  $L_h > 0$ , this forms a contradiction with  $L_h \|x - x'\| \geq L_h r$ . Thus,  $\forall x \in \mathcal{D}_S, x' \in \mathcal{B}(x) \cap \mathcal{D}_S$ , the network predictions are consistent, i.e.  $\mathcal{R}_{\mathcal{D}_S}(h) = 0$ .  $\square$

Assume we have a pseudo-labeler  $h_{pl}$  based on the source model. In Theorem A.2, we establish an upper bound of target error based on expansion property.

**Theorem A.2.** Suppose the condition of Claim 3.1 holds and  $\mathcal{D}_T, \mathcal{D}_S$  satisfies  $(q, \gamma)$ -constant expansion. Then the expected error of model  $h \in \mathcal{H}$  on target domain  $\mathcal{D}_T$  is bounded,

$$\epsilon_{\mathcal{D}_T}(h) \leq (\mathbb{P}_{\mathcal{D}_T}[h(x) \neq h_{pl}(x)] - \epsilon_{\mathcal{D}_S}(h_{pl}) + q) \frac{\mathcal{R}_{\mathcal{D}_T}(h)(1 + \gamma)}{\gamma \cdot \min\{q, \gamma\}} + \max_{i \in [C]} \{d_{\mathcal{H}\Delta\mathcal{H}}(\mathcal{D}_{S_i}, \mathcal{D}_{O_i})\} + \lambda, \quad (11)$$

We have proved that source-like samples are consistency robust (Claim A.1). For the source-like samples, we further assume that  $\epsilon_{\mathcal{D}_S}(h) < \epsilon_{\mathcal{D}_T}(h)$  and  $\mathbb{P}_{x \sim \mathcal{D}_S}[h(x) \neq h_{pl}(x)] < \mathbb{P}_{x \sim \mathcal{D}_T}[h(x) \neq h_{pl}(x)]$ , which empirically holds since all source-like samples with confident predictions [18]. To prove Theorem A.2, we first use the expansion property to study the error bound of  $\mathcal{D}_S$ , and introduce new notations as follows. Let  $\mathcal{M}^i(h) = \{x : h(x) \neq i, x \in \mathcal{D}_{S_i}\}$  denote the source-like samples where the model makes mistakes. The definition is similar for  $\mathcal{M}(h_{pl})$ , the source-like samples where the pseudolabeler makes mistakes. We introduce three disjoint subsets of  $\mathcal{M}^i(h)$  following [26]:  $\mathcal{M}_1^i = \{x : h(x) = h_{pl}(x), h(x) \neq i\}$ ,  $\mathcal{M}_2^i = \{x : h(x) \neq h_{pl}(x), h(x) \neq i, h_{pl}(x) \neq i\}$ ,  $\mathcal{M}_3^i = \{x : h(x) \neq h_{pl}(x), h(x) \neq i, h_{pl}(x) = i\}$ .  $\mathcal{M}_1^i \cup \mathcal{M}_2^i \subseteq \mathcal{M}^i(h_{pl}) \cap \mathcal{M}^i(h)$ , where both  $h$  and  $h_{pl}$  makes mistakes.

When  $h$  fits the pseudolabels well, i.e.  $\mathbb{P}_{x \sim \mathcal{D}_{S_i}}[\mathbb{1}(h(x) \neq h_{pl}(x))] - \epsilon_{\mathcal{D}_{S_i}}(h_{pl}) \leq \gamma$ , the Lemma A.3 in [26] states that:

$$\mathbb{P}_{\mathcal{D}_{S_i}}[\mathcal{M}_1^i \cup \mathcal{M}_2^i] = \mathbb{P}_{\mathcal{D}_{S_i}}[\mathcal{M}_1^i] + \mathbb{P}_{\mathcal{D}_{S_i}}[\mathcal{M}_2^i] \leq q \quad (12)$$

Thus we define  $I = \{i \in [C] \mid \mathbb{P}_{x \sim \mathcal{D}_{S_i}}[\mathbb{1}(h(x) \neq h_{pl}(x))] - \epsilon_{\mathcal{D}_{S_i}}(h_{pl}) \leq \gamma\}$ , where  $[C] = \{1, 2, \dots, C\}$ . The following lemma bounds the probability of  $[C] \setminus I$ .

**Lemma A.1** (Upper bound on the subpopulations of  $[C] \setminus I$ ). Under the setting of Theorem A.2,

$$\sum_{i \in [C] \setminus I} \mathbb{P}_{\mathcal{D}_S}[\mathcal{D}_{S_i}] \leq \frac{1}{\gamma} (\mathbb{P}_{x \in \mathcal{D}_S}[h(x) \neq h_{pl}(x)] - \epsilon_{\mathcal{D}_S}(h_{pl}) + q)$$

*Proof of Lemma A.1.* For any  $i \in [C]$ , the disjoint three parts  $\mathcal{M}_2^i, \mathcal{M}_3^i$ , and  $(\mathcal{M}^i(h_{pl}) \cap \overline{\mathcal{M}^i(h)})$  have inconsistent predictions between  $h$  and  $h_{pl}$ . Thus,  $\mathcal{M}_2^i \cup \mathcal{M}_3^i \cup (\mathcal{M}^i(h_{pl}) \cap \overline{\mathcal{M}^i(h)}) \subseteq \{x : h(x) \neq h_{pl}(x), x \in \mathcal{D}_{S_i}\}$ , and we have:

$$\mathbb{P}_{\mathcal{D}_{S_i}}[\mathcal{M}_2^i] + \mathbb{P}_{\mathcal{D}_{S_i}}[\mathcal{M}_3^i] + \mathbb{P}_{\mathcal{D}_{S_i}}[\mathcal{M}^i(h_{pl}) \cap \overline{\mathcal{M}^i(h)}] \leq \mathbb{P}_{x \sim \mathcal{D}_{S_i}}[h(x) \neq h_{pl}(x)] \quad (13)$$

It is not hard to verify that  $\mathcal{M}^i(h_{pl}) \setminus \mathcal{M}_1^i \subseteq \mathcal{M}_2^i \cup (\mathcal{M}^i(h_{pl}) \cap \overline{\mathcal{M}^i(h)})$ , then:

$$\begin{aligned} \epsilon_{\mathcal{D}_{S_i}}(h_{pl}) - \mathbb{P}_{\mathcal{D}_{S_i}}[\mathcal{M}_1^i] &\leq \mathbb{P}_{\mathcal{D}_{S_i}}[\mathcal{M}^i(h_{pl}) \setminus \mathcal{M}_1^i] \\ &\leq \mathbb{P}_{\mathcal{D}_{S_i}}[\mathcal{M}_2^i] + \mathbb{P}_{\mathcal{D}_{S_i}}[\mathcal{M}^i(h_{pl}) \cap \overline{\mathcal{M}^i(h)}] \\ &\text{by Eqn. 13} \leq \mathbb{P}_{x \sim \mathcal{D}_{S_i}}[h(x) \neq h_{pl}(x)] - \mathbb{P}_{\mathcal{D}_{S_i}}[\mathcal{M}_3^i] \end{aligned} \quad (14)$$

Then, we can write:

$$\begin{aligned} \mathbb{P}_{x \sim \mathcal{D}_S}[h(x) \neq h_{pl}(x)] &= \sum_{i \in I} \mathbb{P}_{x \sim \mathcal{D}_{S_i}}[h(x) \neq h_{pl}(x)] \mathbb{P}_{\mathcal{D}_S}[\mathcal{D}_{S_i}] \\ &\quad + \sum_{i \in [C] \setminus I} \mathbb{P}_{x \sim \mathcal{D}_{S_i}}[h(x) \neq h_{pl}(x)] \mathbb{P}_{\mathcal{D}_S}[\mathcal{D}_{S_i}] \\ &\text{by Eqn. 14} \geq \sum_{i \in I} \mathbb{P}_{\mathcal{D}_S}[\mathcal{D}_{S_i}] (\epsilon_{\mathcal{D}_{S_i}}(h_{pl}) - \mathbb{P}_{\mathcal{D}_{S_i}}[\mathcal{M}_1^i]) \\ &\quad + \sum_{i \in [C] \setminus I} \mathbb{P}_{x \sim \mathcal{D}_{S_i}}[h(x) \neq h_{pl}(x)] \mathbb{P}_{\mathcal{D}_S}[\mathcal{D}_{S_i}] \\ &\text{by Eqn. 12 and Definition of } I > \sum_{i \in I} \mathbb{P}_{\mathcal{D}_S}[\mathcal{D}_{S_i}] (\epsilon_{\mathcal{D}_{S_i}}(h_{pl}) - q) \\ &\quad + \sum_{i \in [C] \setminus I} (\epsilon_{\mathcal{D}_{S_i}}(h_{pl}) + \gamma) \mathbb{P}_{\mathcal{D}_S}[\mathcal{D}_{S_i}] \\ &\geq \epsilon_{\mathcal{D}_{S_i}}(h_{pl}) - q + \gamma \sum_{i \in [C] \setminus I} \mathbb{P}_{\mathcal{D}_S}[\mathcal{D}_{S_i}] \end{aligned} \quad (15)$$

By organizing the Eqn. 15, we complete the proof.  $\square$

**Lemma A.2.** Under the condition of Theorem A.2, for any  $i \in I$ , the task error on  $\mathcal{D}_{S_i}$  is bounded by:

$$\epsilon_{\mathcal{D}_{S_i}}(h) \leq \mathbb{P}_{x \sim \mathcal{D}_{S_i}}[h(x) \neq h_{pl}(x)] - \epsilon_{\mathcal{D}_{S_i}}(h_{pl}) + 2q$$

*Proof of Lemma A.2.* For  $i \in I$ , we can write:

$$\begin{aligned} \epsilon_{\mathcal{D}_{S_i}}(h) &= \mathbb{P}_{\mathcal{D}_{S_i}}[\mathcal{M}_2^i] + \mathbb{P}_{\mathcal{D}_{S_i}}[\mathcal{M}_3^i] + \mathbb{P}_{\mathcal{D}_{S_i}}[\mathcal{M}_1^i] \\ &\text{by Eqn. 14} \leq \mathbb{P}_{\mathcal{D}_{S_i}}[\mathcal{M}_2^i] + 2\mathbb{P}_{\mathcal{D}_{S_i}}[\mathcal{M}_1^i] + \mathbb{P}_{x \sim \mathcal{D}_{S_i}}[h(x) \neq h_{pl}(x)] - \epsilon_{\mathcal{D}_{S_i}}(h_{pl}) \\ &\leq 2(\mathbb{P}_{\mathcal{D}_{S_i}}[\mathcal{M}_2^i] + \mathbb{P}_{\mathcal{D}_{S_i}}[\mathcal{M}_1^i]) + \mathbb{P}_{x \sim \mathcal{D}_{S_i}}[h(x) \neq h_{pl}(x)] - \epsilon_{\mathcal{D}_{S_i}}(h_{pl}) \\ &\text{by Eqn. 12} \leq 2q + \mathbb{P}_{x \sim \mathcal{D}_{S_i}}[h(x) \neq h_{pl}(x)] - \epsilon_{\mathcal{D}_{S_i}}(h_{pl}) \end{aligned} \quad (16)$$

$\square$

Based on the results above, we turn to bound the target error on the whole target data.

*Proof of Theorem A.2.*

$$\epsilon_{\mathcal{D}_T}(h) = \sum_{i=1}^C \mathbb{P}_{\mathcal{D}_T}[\mathcal{D}_{T_i}] \epsilon_{\mathcal{D}_{T_i}}(h) = \sum_{i \in G_1} \mathbb{P}_{\mathcal{D}_T}[\mathcal{D}_{T_i}] \epsilon_{\mathcal{D}_{T_i}}(h) + \sum_{i \in G_2} \mathbb{P}_{\mathcal{D}_T}[\mathcal{D}_{T_i}] \epsilon_{\mathcal{D}_{T_i}}(h) \quad (17)$$

Following [25], we define  $G_1 = \{i \in [C] : \mathcal{R}_{\mathcal{D}_{T_i}}(h) \leq \min\{q, \gamma\}\}$ ,  $G_2 = \{i \in [C] : \mathcal{R}_{\mathcal{D}_{T_i}}(h) > \min\{q, \gamma\}\}$ , by the Lemma 2 in [25], we also claim that, for  $\forall i \in G_1$ :

$$\epsilon_{\mathcal{D}_{T_i}}(h) \leq q, \quad (18)$$

otherwise, by the expansion property A.1,  $\mathbb{P}_{\mathcal{D}_{T_i}}[\mathcal{N}(\mathcal{M}^i(h)) \setminus \mathcal{M}^i(h)] > \min\{q, \gamma\}$ . We claim that the  $\mathcal{N}(\mathcal{M}^i(h)) \setminus \mathcal{M}^i(h)$  is subset of  $\mathcal{R}_{\mathcal{D}_{T_i}}(h)$ . If not,  $\exists x \in \mathcal{N}(\mathcal{M}^i(h)) \setminus \mathcal{M}^i(h)$ , say  $x \in \mathcal{N}(\mathcal{M}^i(h) \setminus \mathcal{R}_{\mathcal{D}_{T_i}}(h))$ , by the definition of neighborhood,  $\exists x' \in \mathcal{M}^i(h) \setminus \mathcal{R}_{\mathcal{D}_{T_i}}(h)$  s.t.  $\exists x'' \in \mathcal{B}(x) \cap \mathcal{B}(x')$ . By the definition of  $\mathcal{R}_{\mathcal{D}_{T_i}}(h)$ , we have  $h(x) = h(x') = h(x'') = i$ , which contradicts to  $x' \in \mathcal{M}^i(h)$ . Therefore, the consistency error on the subpopulations  $\mathcal{R}_{\mathcal{D}_{T_i}}(h) \geq \mathbb{P}_{\mathcal{D}_{T_i}}[\mathcal{N}(\mathcal{M}^i(h)) \setminus \mathcal{M}^i(h)] > \min\{q, \gamma\}$ , which contradicts to the definition of  $G_1$  that  $\mathcal{R}_{\mathcal{D}_{T_i}}(h) \leq \min\{q, \gamma\}$ .

For  $i \in G_2$ , by the Lemma 1 in [25], we have:

$$\sum_{i \in G_2} \mathbb{P}_{\mathcal{D}_T}[\mathcal{D}_{T_i}] \leq \frac{\mathcal{R}_{\mathcal{D}_T}(h)}{\min\{q, \gamma\}}, \quad (19)$$

otherwise,  $\mathcal{R}_{\mathcal{D}_T}(h) > \sum_{i \in G_2} \mathbb{P}_{\mathcal{D}_T}[\mathcal{D}_{T_i}] \min\{q, \gamma\} > \mathcal{R}_{\mathcal{D}_T}(h)$ , which forms contradiction.

The consistency error on the subpopulation of  $G_2$  is greater than  $\min\{\gamma, q\}$ , we use our divided source-like set to estimate the target error  $\epsilon_{\mathcal{D}_{T_i}}$ . Following the Theorem 2 in [28], for all  $h$  in the model space of  $C$ -way classification task  $\mathcal{H}$ , we have:

$$\begin{aligned} \epsilon_{\mathcal{D}_{T_i}}(h) &= \mathbb{P}_{\mathcal{D}_{T_i}}[\mathcal{D}_{S_i}] \epsilon_{\mathcal{D}_{S_i}}(h) + \mathbb{P}_{\mathcal{D}_{T_i}}[\mathcal{D}_{O_i}] \epsilon_{\mathcal{D}_{O_i}}(h) \\ &\leq \mathbb{P}_{\mathcal{D}_{T_i}}[\mathcal{D}_{S_i}] \epsilon_{\mathcal{D}_{S_i}}(h) + \mathbb{P}_{\mathcal{D}_{T_i}}[\mathcal{D}_{O_i}] (\epsilon_{\mathcal{D}_{S_i}}(h) + d_{\mathcal{H}\Delta\mathcal{H}}(\mathcal{D}_{S_i}, \mathcal{D}_{O_i}) + \lambda_i) \\ &\leq \epsilon_{\mathcal{D}_{S_i}}(h) + d_{\mathcal{H}\Delta\mathcal{H}}(\mathcal{D}_{S_i}, \mathcal{D}_{O_i}) + \lambda_i, \end{aligned} \quad (20)$$

where  $\lambda_i = \min_{h \in \mathcal{H}} \{\epsilon_{\mathcal{D}_{S_i}}(h) + \epsilon_{\mathcal{D}_{O_i}}(h)\}$ . Organizing Eqn. 18,19,20 into Eqn. 17, we have:

$$\begin{aligned} \epsilon_{\mathcal{D}_T} &\leq \sum_{i \in G_1} \mathbb{P}_{\mathcal{D}_T}[\mathcal{D}_{T_i}] q + \sum_{i \in G_2} \mathbb{P}_{\mathcal{D}_T}[\mathcal{D}_{T_i}] \epsilon_{\mathcal{D}_{S_i}}(h) + \max_i \{d_{\mathcal{H}\Delta\mathcal{H}}(\mathcal{D}_{S_i}, \mathcal{D}_{O_i})\} + \lambda' \\ &\leq q + \sum_{i \in G_2} \mathbb{P}_{\mathcal{D}_T}[\mathcal{D}_{T_i}] \epsilon_{\mathcal{D}_{S_i}}(h) + \max_i \{d_{\mathcal{H}\Delta\mathcal{H}}(\mathcal{D}_{S_i}, \mathcal{D}_{O_i})\} + \lambda' \\ \text{(by Eqn. 19)} &\leq \frac{\mathcal{R}_{\mathcal{D}_T}(h)}{\min\{q, \gamma\}} \epsilon_{\mathcal{D}_S}(h) + \max_i \{d_{\mathcal{H}\Delta\mathcal{H}}(\mathcal{D}_{S_i}, \mathcal{D}_{O_i})\} + \lambda' + q \end{aligned} \quad (21)$$

where  $\lambda' = \min_{h \in \mathcal{H}} \{\epsilon_{\mathcal{D}_S}(h) + \epsilon_{\mathcal{D}_O}(h)\}$ . Then, there is:

$$\begin{aligned} \epsilon_{\mathcal{D}_S}(h) &= \sum_{i \in I} \epsilon_{\mathcal{D}_{S_i}}(h) \mathbb{P}_{\mathcal{D}_S}[\mathcal{D}_{S_i}] + \sum_{i \in [c] \setminus I} \mathbb{P}_{\mathcal{D}_S}[\mathcal{D}_{S_i}] \epsilon_{\mathcal{D}_{S_i}}(h) \\ \text{(by Lemma A.1)} &\leq \frac{1}{\gamma} (\mathbb{P}_{x \sim \mathcal{D}_S}[h(x) \neq h_{pl}(x)] - \epsilon_{\mathcal{D}_S}(h_{pl}) + q) + \sum_{i \in [c] \setminus I} \mathbb{P}_{\mathcal{D}_S}[\mathcal{D}_{S_i}] \epsilon_{\mathcal{D}_{S_i}}(h) \\ \text{(by Lemma A.2)} &\leq \frac{1}{\gamma} (\mathbb{P}_{x \sim \mathcal{D}_S}[h(x) \neq h_{pl}(x)] - \epsilon_{\mathcal{D}_S}(h_{pl}) + q) \\ &\quad + \mathbb{P}_{x \in \mathcal{D}_S}[h(x) \neq h_{pl}(x)] - \epsilon_{\mathcal{D}_S}(h_{pl}) + 2q \\ &\leq \frac{1+\gamma}{\gamma} (\mathbb{P}_{x \sim \mathcal{D}_T}[h(x) \neq h_{pl}(x)] - \epsilon_{\mathcal{D}_S}(h_{pl}) + q) + q. \end{aligned} \quad (22)$$

Combining the results of Eqn. 21 and Eqn. 22, we prove the result of Theorem A.2. Specifically, in Eqn. 11, the  $\lambda = \lambda' + q(1 + \frac{\mathcal{R}_{\mathcal{D}_T}(h)(1+\gamma)}{\gamma \cdot \min\{q, \gamma\}})$  is a constant *w.r.t* the expansion constant  $q$  and task risk of ideal optimal model.  $\square$

## B Additional Experimental Details

### B.1 Implementation Details

We train our model on four Nvidia Geforce GTX 1080Ti graphic cards, using SGD with a momentum of 0.9, and a weight decay of 0.0005. We conduct experiments on VisDA, Office-Home and DomainNet and set the batch size to 64 for all benchmarks. The initial learning rate is set as 5e-4

for VisDA, 2e-2 for Office-Home, and 1e-2 for DomainNet. The total epoch is set as 60 for VisDA, 30 for Office-Home and DomainNet. We apply the learning rate scheduler  $\eta = \eta_0(1 + 15p)^{3/4}$  following [1], where training process  $p$  changes from 0 to 1, and we further reduce the learning rate by a factor of 10 after 40 epochs on Visda, 15 epochs on Office-Home and DomainNet. We find that most hyperparameters of *DaC* do not require to be heavily tuned. As can be seen in Table 7, the performance is not sensitive to the choice of  $\tau_c$ , and we set the confidence threshold  $\tau_c$  as 0.95 for all experiments following [50, 35]. We adopt a set of hyperparameters  $\alpha = 0.5, \beta = 0.5, K = 5$  for the large scale benchmarks VisDA and DomainNet, and  $\alpha = 0.7, \beta = 0.3, K = 3$  for most transfer scenarios of Office-Home.

Table 7: Sensitive analysis of  $\tau_c$ .

| $\tau_c$ | 0.91  | 0.93  | 0.95  | 0.97  | 0.98  | target-supervised |
|----------|-------|-------|-------|-------|-------|-------------------|
| Avg. (%) | 87.06 | 87.27 | 87.34 | 87.39 | 87.19 | 89.6              |

## B.2 Baseline Methods on DomainNet

We compare *DaC* with source-present and source-free domain adaptation methods. DomainNet is widely used in multi-source domain adaptation tasks, and its subset is used as one of the benchmarks of single-source domain adaptation benchmark by [34]. The results of MME [34] and CDAN [40] are copied from [34]. The rest source-present and source-free methods are implemented by their official codes. We choose the learning rate for all baselines by five-fold cross-validation, and apply the training scheduler of their own.

## C Algorithm for DaC

As shown in Algorithm 1, our method consists of self-training by pseudo-labeling, adaptive contrastive learning, and distribution alignment. After self-training to achieve preliminary class-wise adaptation, we divide target data as source-like and target-specific to conduct representation learning. The adaptive contrastive learning framework exploits local and global information and improves feature discriminability. Distribution alignment reduces the mismatching between source-like and target-specific samples.

## References

- [1] Jian Liang, Dapeng Hu, and Jiashi Feng. Do we really need to access the source data? source hypothesis transfer for unsupervised domain adaptation. In *International Conference on Machine Learning (ICML)*, pages 6028–6039, 2020.
- [2] Shiqi Yang, Yaxing Wang, Joost van de weijer, Luis Herranz, and SHANGLING JUI. Exploiting the intrinsic neighborhood structure for source-free domain adaptation. In A. Beygelzimer, Y. Dauphin, P. Liang, and J. Wortman Vaughan, editors, *Advances in Neural Information Processing Systems*, 2021.
- [3] Zhen Qiu, Yifan Zhang, Hongbin Lin, Shuaicheng Niu, Yanxia Liu, Qing Du, and Mingkui Tan. Source-free domain adaptation via avatar prototype generation and adaptation. In *International Joint Conference on Artificial Intelligence*, 2021.
- [4] Rui Li, Qianfen Jiao, Wenming Cao, Hau-San Wong, and Si Wu. Model adaptation: Unsupervised domain adaptation without source data. In *Proceedings of the IEEE/CVF Conference on Computer Vision and Pattern Recognition*, pages 9641–9650, 2020.
- [5] Shiqi Yang, Yaxing Wang, Joost van de Weijer, Luis Herranz, and Shangling Jui. Generalized source-free domain adaptation. *ICCV*, 2021.
- [6] Leland McInnes, John Healy, Nathaniel Saul, and Lukas Grossberger. Umap: Uniform manifold approximation and projection. *The Journal of Open Source Software*, 3(29):861, 2018.



- [17] Jiayi Tian, Jing Zhang, Wen Li, and Dong Xu. VDM-DA: virtual domain modeling for source data-free domain adaptation. *CoRR*, 2021.
- [18] Youngeun Kim, Donghyeon Cho, et al. Progressive domain adaptation from a source pre-trained model. *ArXiv*, 2020.
- [19] Weijie Chen, Luojun Lin, Shicai Yang, Di Xie, Shiliang Pu, Yueting Zhuang, and Wenqi Ren. Self-supervised noisy label learning for source-free unsupervised domain adaptation. *CoRR*, 2021.
- [20] Aron van den Oord, Yazhe Li, and Oriol Vinyals. Representation learning with contrastive predictive coding. *CoRR*, abs/1807.03748, 2018.
- [21] Kaiming He, Haoqi Fan, Yuxin Wu, Saining Xie, and Ross Girshick. Momentum contrast for unsupervised visual representation learning. *arXiv preprint arXiv:1911.05722*, 2019.
- [22] Ting Chen, Simon Kornblith, et al. A simple framework for contrastive learning of visual representations. In *ICML*, 2020.
- [23] Yonglong Tian, Dilip Krishnan, and Phillip Isola. Contrastive multiview coding. *ECCV*, 2020.
- [24] Chengxu Zhuang, Alex Lin Zhai, and Daniel Yamins. Local aggregation for unsupervised learning of visual embeddings. *CoRR*, 2019.
- [25] Hong Liu, Jianmin Wang, and Mingsheng Long. Cycle self-training for domain adaptation. In M. Ranzato, A. Beygelzimer, Y. Dauphin, P.S. Liang, and J. Wortman Vaughan, editors, *Advances in Neural Information Processing Systems*, volume 34, pages 22968–22981. Curran Associates, Inc., 2021.
- [26] Colin Wei, Kendrick Shen, Yining Chen, and Tengyu Ma. Theoretical analysis of self-training with deep networks on unlabeled data. *ICLR*, 2021.
- [27] Tianle Cai, Ruiqi Gao, Jason Lee, and Qi Lei. A theory of label propagation for subpopulation shift. In Marina Meila and Tong Zhang, editors, *Proceedings of the 38th International Conference on Machine Learning*, Proceedings of Machine Learning Research. PMLR, 18–24 Jul 2021.
- [28] Shai Ben-David, John Blitzer, Koby Crammer, Alex Kulesza, Fernando Pereira, and Jennifer Wortman Vaughan. A theory of learning from different domains. *Machine learning*, 79(1):151–175, 2010.
- [29] Ekin D Cubuk, Barret Zoph, Dandelion Mane, Vijay Vasudevan, and Quoc V Le. Autoaugment: Learning augmentation strategies from data. In *Proceedings of the IEEE conference on computer vision and pattern recognition*, pages 113–123, 2019.
- [30] Claude Elwood Shannon. A mathematical theory of communication. *The Bell System Technical Journal*, 27:379–423, 1948.
- [31] Hemanth Venkateswara, Jose Eusebio, et al. Deep hashing network for unsupervised domain adaptation. *CVPR*, 2017.
- [32] Xingchao Peng, Ben Usman, et al. Visda: The visual domain adaptation challenge. *ArXiv*, 2017.
- [33] Xingchao Peng, Qinxun Bai, Xide Xia, Zijun Huang, Kate Saenko, and Bo Wang. Moment matching for multi-source domain adaptation. In *Proceedings of the IEEE International Conference on Computer Vision*, pages 1406–1415, 2019.
- [34] Kuniaki Saito, Donghyun Kim, Stan Sclaroff, Trevor Darrell, and Kate Saenko. Semi-supervised domain adaptation via minimax entropy. *ICCV*, 2019.
- [35] Jichang Li, Guanbin Li, Yemin Shi, and Yizhou Yu. Cross-domain adaptive clustering for semi-supervised domain adaptation. In *Proceedings of the IEEE/CVF Conference on Computer Vision and Pattern Recognition (CVPR)*, pages 2505–2514, June 2021.
- [36] Kaiming He, Xiangyu Zhang, et al. Deep residual learning for image recognition. *CVPR*, 2016.

- [37] Jian Liang, Dapeng Hu, Yunbo Wang, Ran He, and Jiashi Feng. Source data-absent unsupervised domain adaptation through hypothesis transfer and labeling transfer. *IEEE Transactions on Pattern Analysis and Machine Intelligence (TPAMI)*, 2021. In Press.
- [38] Spyros Gidaris, Praveer Singh, and Nikos Komodakis. Unsupervised representation learning by predicting image rotations. *ICLR*, 2018.
- [39] David Berthelot, Nicholas Carlini, Ian Goodfellow, Nicolas Papernot, Avital Oliver, and Colin Raffel. Mixmatch: A holistic approach to semi-supervised learning. *NeurIPS*, 2019.
- [40] Mingsheng Long, Zhangjie Cao, et al. Conditional adversarial domain adaptation. In *NeurIPS*, 2018.
- [41] Chen-Yu Lee, Tanmay Batra, Mohammad Haris Baig, and Daniel Ulbricht. Sliced wasserstein discrepancy for unsupervised domain adaptation. In *CVPR*, 2019.
- [42] Ying Jin, Ximei Wang, et al. Minimum class confusion for versatile domain adaptation. In *ECCV*, 2020.
- [43] Zhihe Lu, Yongxin Yang, Xiatian Zhu, Cong Liu, Yi-Zhe Song, and Tao Xiang. Stochastic classifiers for unsupervised domain adaptation. In *Proceedings of the IEEE/CVF Conference on Computer Vision and Pattern Recognition (CVPR)*, June 2020.
- [44] Shuang Li, Fangrui Lv, Binhui Xie, Chi Harold Liu, Jian Liang, and Chen Qin. Bi-classifier determinacy maximization for unsupervised domain adaptation. In *Thirty-Fifth AAAI Conference on Artificial Intelligence (AAAI-21)*, 2021.
- [45] Shuhao Cui, Shuhui Wang, Junbao Zhuo, Chi Su, Qingming Huang, and Tian Qi. Gradually vanishing bridge for adversarial domain adaptation. In *Proceedings of the IEEE Conference on Computer Vision and Pattern Recognition*, 2020.
- [46] Shiqi Yang, Yaxing Wang, Joost van de Weijer, Luis Herranz, and Shangling Jui. Casting a bait for offline and online source-free domain adaptation. *arXiv preprint arXiv:2010.12427*, 2020.
- [47] Shuhao Cui, Shuhui Wang, et al. Towards discriminability and diversity: Batch nuclear-norm maximization under label insufficient situations. *CVPR*, 2020.
- [48] Guanglei Yang, Haifeng Xia, et al. Bi-directional generation for unsupervised domain adaptation. In *AAAI*, 2020.
- [49] Qizhe Xie, Zihang Dai, Eduard Hovy, Thang Luong, and Quoc Le. Unsupervised data augmentation for consistency training. In H. Larochelle, M. Ranzato, R. Hadsell, M.F. Balcan, and H. Lin, editors, *Advances in Neural Information Processing Systems*, volume 33, pages 6256–6268. Curran Associates, Inc., 2020.
- [50] Alex Kurakin, Chun-Liang Li, Colin Raffel, David Berthelot, Ekin Dogus Cubuk, Han Zhang, Kihyuk Sohn, Nicholas Carlini, and Zizhao Zhang. Fixmatch: Simplifying semi-supervised learning with consistency and confidence. In *NeurIPS*, 2020.
